# Supplementary material
Source: Springer Nature journal article supplement (https://www.springermedizin.de/resource/supplementary/12913_2007_664_MOESM1_ESM.pdf/9535932)
Supplement: MOESM1 [file 9535932]

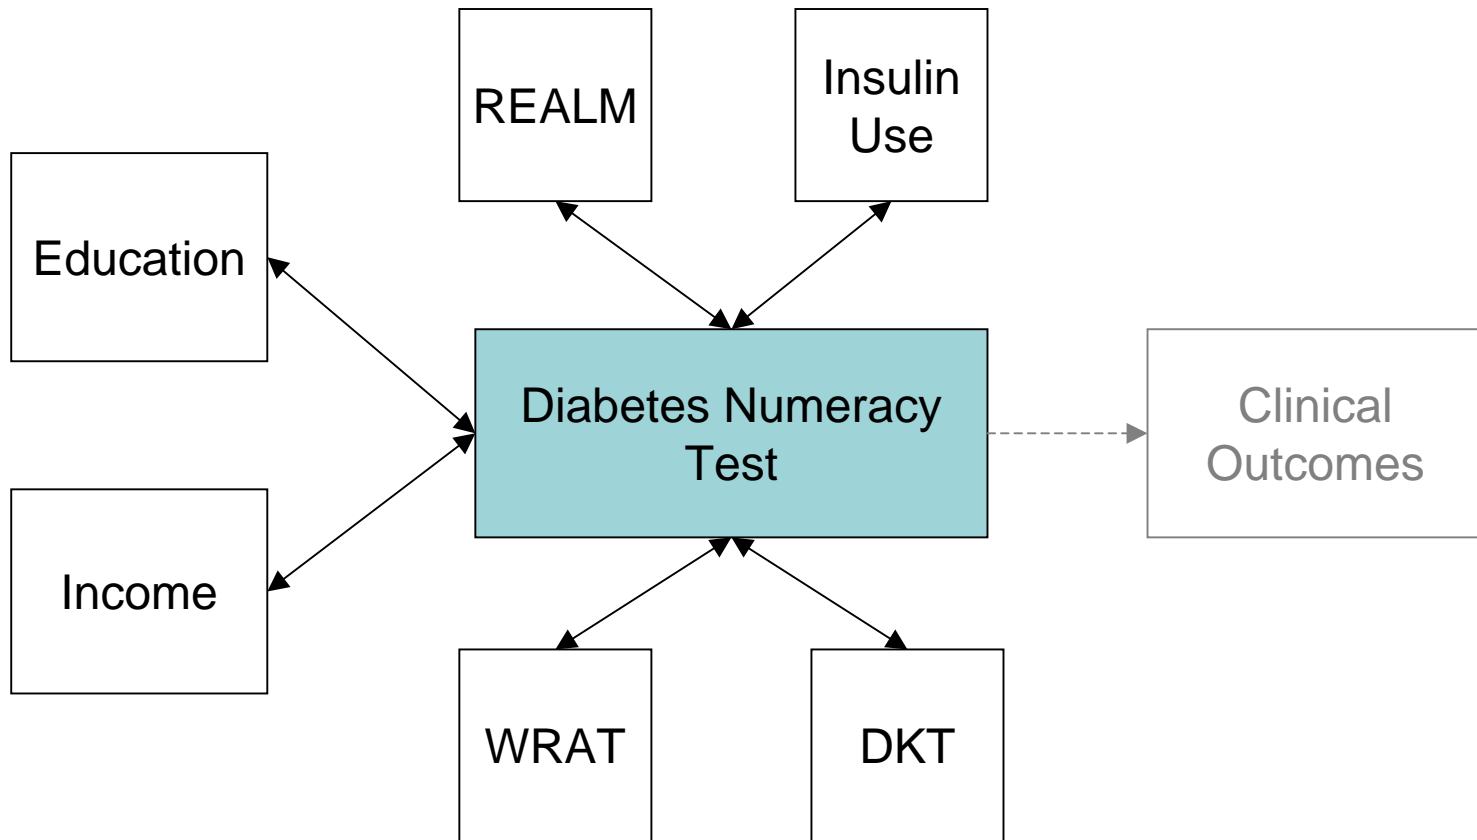

REALM – Rapid Estimate of Adult Literacy in Medicine; WRAT - Wide Range Achievement Test; DKT – Diabetes Knowledge Test
